# Supplementary material
Source: HighWire-hosted journal article supplement (https://jnm.snmjournals.org/highwire/filestream/95484/field_highwire_adjunct_files/0/216721_Supplemental_Data.pdf)
Supplement: 216721_Supplemental_Data.pdf [file 216721_Supplemental_Data.pdf]

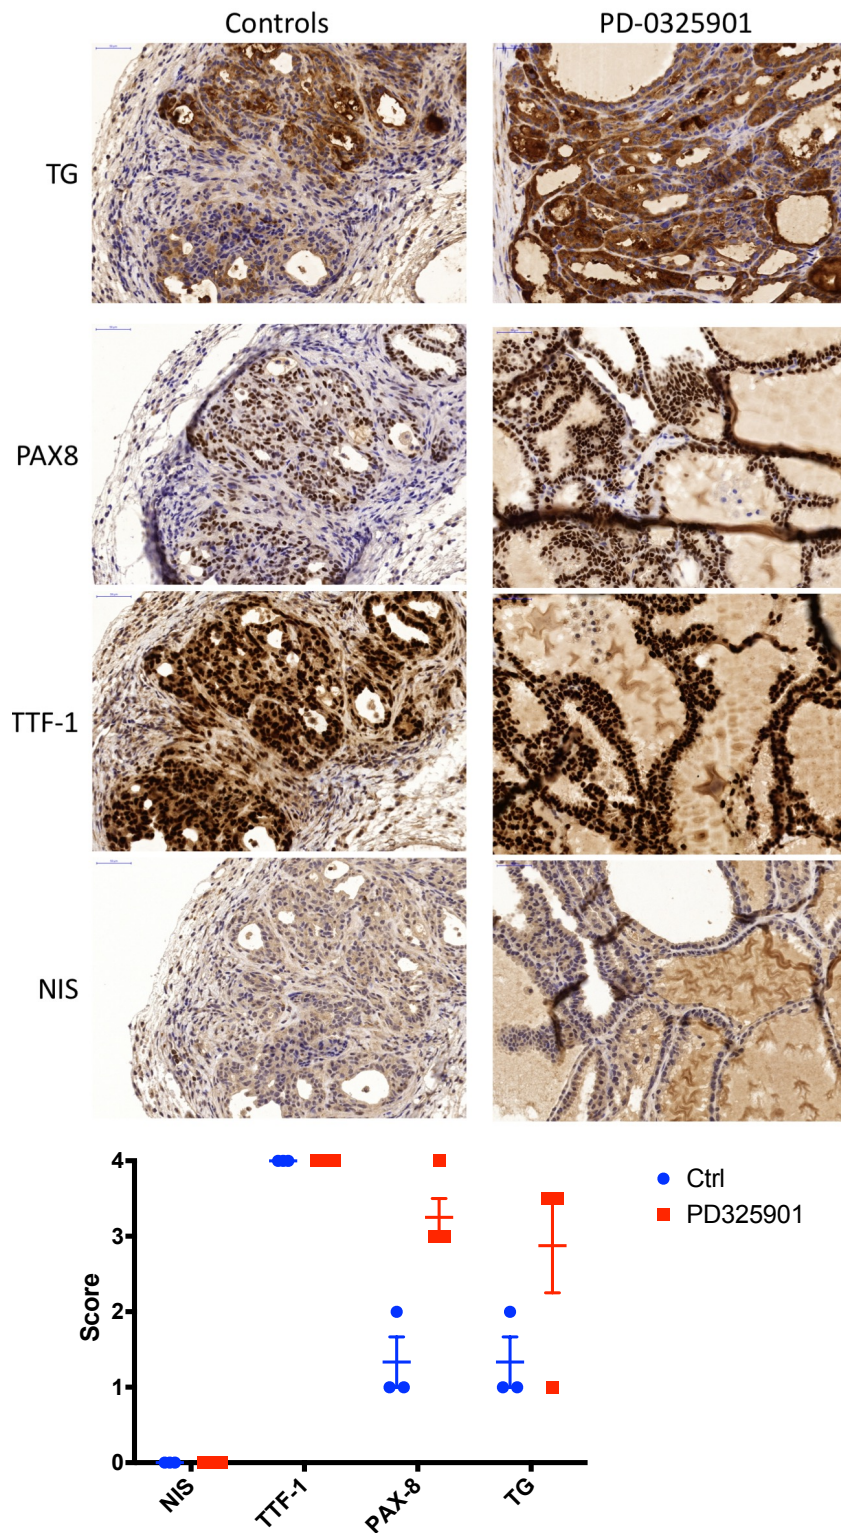

**Supplemental figure 1:**

Upper panel: IHC for Thyroglobulin (TG), PAX-8, Thyroid transcription factor 1 (TTF-1) and Sodium iodine symporter (NIS) on thyroid tissues treated for 10 days with 5 mg/kg of PD-0325901.

Lower Panel: Score of the depicted IHC, individual values with mean and SEM (0= Negative, 1=weak positive, 2=Positive, 3=strongly positive, 4=very strong positive).

### Supplemental Material and Methods:

IHC stains were obtained by automatized stainings with a Leica immunostainer following the protocol described here: Berezowska S, Galván JA. *Methods Mol Biol.* 2017;1560:189-194. doi: 10.1007/978-1-4939-6788-9\_13. PMID: 28155154.

The following antibodies and specific conditions were used:

| Antibody                  | Dilution | Antigen retrieval      | Host   | incubatin time | Polymer | DAB chromogen(*) | Comany      | Ref. Number |
|---------------------------|----------|------------------------|--------|----------------|---------|------------------|-------------|-------------|
| TG                        | 1:10000  | Tris buffer 30 min 95º | Rb     | 15min          | 8min    | 8min             | Dako        | A0251       |
| PAX8                      | 1:1200   | Tris buffer 30 min 95º | Rb     | 15min          | 8min    | 8min             | Proteintech | 10336-1-AP  |
| TTF1                      | 1:50     | Tris buffer 30 min 95º | Rb     | 30min          | 15min   | 10min            | Santa Cruz  | sc-13040    |
| NIS                       | 1:50     | Tris buffer 30 min 95º | Rb     | 30min          | 15min   | 10min            | Abbiotec    | 250552      |
| <b>Visualization Kits</b> |          |                        |        |                |         |                  |             |             |
| Bond Polymer              |          | Leica Biosystems       | DS9800 |                |         |                  |             |             |
| Refine Detection (*)      |          |                        |        |                |         |                  |             |             |
| <b>Autostainer</b>        |          |                        |        |                |         |                  |             |             |
| Leica BOND RX             |          | Leica Biosystems       |        |                |         |                  |             |             |

|                 | total (ATC) | BRAF       | frequency  | PI3K      | frequency  | BRAF/PI3K | frequency  |
|-----------------|-------------|------------|------------|-----------|------------|-----------|------------|
| Pozdeyev et al. | 196         | 84         | 43%        | 29        | 15%        | 23        | 12%        |
| Kunstman et al. | 22          | 6          | 27%        | 2         | 9%         | 2         | 9%         |
| Landa et al.    | 33          | 15         | 45%        | 6         | 18%        | 5         | 15%        |
| <b>TOTAL</b>    | <b>251</b>  | <b>105</b> | <b>42%</b> | <b>37</b> | <b>15%</b> | <b>30</b> | <b>12%</b> |

### Supplemental table 1:

Analysis of BRAF and PI3K mutations occurrence in thyroid cancers.

Data extracted from:

Pozdeyev N, Gay LM, Sokol ES, et al. Genetic analysis of 779 advanced differentiated and anaplastic thyroid cancers. *Clin Cancer Res.* 2018.

Landa I, Ibrahimasic T, Boucai L, et al. Genomic and transcriptomic hallmarks of poorly differentiated and anaplastic thyroid cancers.

*J Clin Invest.* 2016 and Kunstman JW, Christofer Juhlin C, Goh G, et al. Characterization of the mutational landscape of anaplastic thyroid cancer via whole-exome sequencing. *Hum Mol Genet.* 2015.
